# Supplementary material
Source: PubMed Central journal article supplement (PMC1899956)
Supplement: molcellb_27_9_3530__1.pdf [file molcellb_27_9_3530__1.pdf]

Supplemental Table 1.

Table 1. List of primers used for the plasmid constructs

| Primer name        | Sequence from 5' to 3'                       |
|--------------------|----------------------------------------------|
| P21 forward        | 5'CGGATCCACCATGTCAGAACCGGCTGGGGATGTC3'       |
| aa119 reverse      | 5'GAATTCAAGGGTACAAGACAGTGACAGGT3'            |
| aa140 reverse      | 5'GAATTCTCGACCCTGAGAGTCTCCAGGTC3'            |
| aa164 reverse      | GAATTCGGGCTTCCTCTTGGAGAAGATC                 |
| p21S98Aforward     | GGCAGGCGGCCTGGCACCGCACCTGCTCTGCTGCAGG        |
| P21S98A reverse    | CCTGCAGCAGAGCAGGTGCGGTGCCAGGCCGCCTGCC        |
| p21S98EForward     | AGGCAGGCGGCCTGGCACCGAACCTGCTCTGCTGCAGGGGA    |
| p21S98EReverse     | TCCCCTGCAGCAGAGCAGGTTTCGGTGCCAGGCCGCCTGCCT   |
| P21R94Tforward     | GAGTTGGGAGGAGGCAGGACGCCTGGCACCTCACCTG        |
| P21R94Treverse     | GCAGGTGAGGTGCCAGGCGTCCTGCCTCCTCCCAACTC       |
| D80/5 forward      | CTGCCAAGCTCTACCTTCCCCGGGATGAGTTGGGAGGAGGCA   |
| D80/5 reverse      | TGCCTCCTCCCAACTCATCCCCGGGAAGGTAGAGCTTGGGCAG  |
| D94/8 forward      | GGATGAGTTGGGAGGAGGCAGGCCTGCTCTGCTGCAGGGGACAG |
| D94/8 reverse      | CTGTCCCCTGCAGCAGAGCAGGCCTGCCTCCTCCCAACTCATCC |
| D108/12 forward    | TCTGCTGCAGGGGACAGCAGAGCTGTCACTGTCTTGTACCCTTG |
| D108/12 reverse    | CAAGGGTACAAGACAGTGACAGCTCTGCTGTCCCCTGCAGCAGA |
| ASK1 Forward       | TCCCCGCGGACCATGAGCACGGAGGCGGACGAGGGC         |
| ASK1aa 762 Re      | ATTTGCGGCCGCTCCAGCAAGTCACTTTCACAGTCTCC       |
| GT689/90/AV<br>For | CAGAGTCGTTTTAGGAAAAGCCGCTTATGGGATAGTC        |
| GT689/90/AV<br>Rev | GACTATCCCATAAGCGGCTTTTCCTAAAACGACTCTG        |
| Y792F For          | CAAATACTGGAAGGATTAATAATTTCTCCATGACAATCAGATAG |
| Y792F Rev.         | CTATCTGATTGTCATGGAGAAATTTAATCCTTCCAGTATTTG   |

R802T For

CATGACAATCAGATAGTTCACACGGACATAAAGGGTGACAATG
